# Supplementary material for: Improvement in Thermochromic Offset Print UV Stability by Applying PCL Nanocomposite Coatings
Source: MDPI journal article supplement (doi:10.3390/polym14071484), 2022-04-06
Supplement: s1 [file s1]

Supplementary materials

# Improvement of thermochromic offset prints UV stability by applying PCL nanocomposite coatings

Marina Vukoje <sup>1\*</sup>, Rahela Kulčar <sup>2\*</sup>, Katarina Itrić Ivanda <sup>1</sup>, Josip Bota<sup>1</sup> and Tomislav Cigula<sup>1</sup>

<sup>1</sup> University of Zagreb Faculty of Graphic Arts, Getaldićeva 2, 10000 Zagreb, Croatia;

[katarina.itric.ivanda@grf.unizg.hr](mailto:katarina.itric.ivanda@grf.unizg.hr) (K.I.I.); [josip.bota@grf.unizg.hr](mailto:josip.bota@grf.unizg.hr) (J.B); [tomislav.cigula@grf.unizg.hr](mailto:tomislav.cigula@grf.unizg.hr) (T.C)

\* Correspondence: [marina.vukoje@grf.unizg.hr](mailto:marina.vukoje@grf.unizg.hr) (M.V); [rahela.kulcar@grf.unizg.hr](mailto:rahela.kulcar@grf.unizg.hr) (R.K)

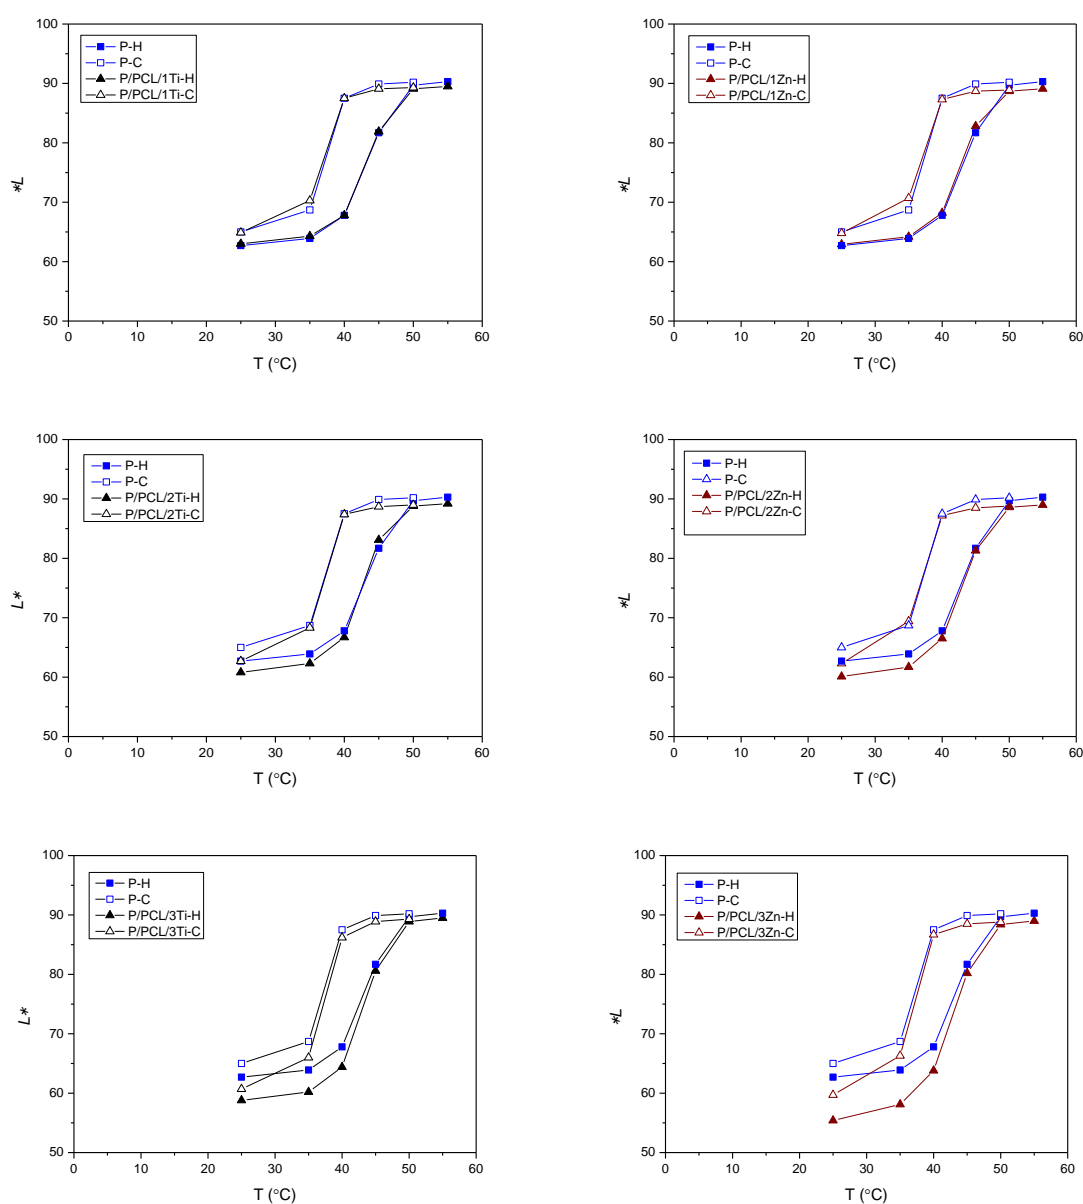

**Figure S1.** CIELAB lightness  $L^*$  of prepared samples before UV exposure in dependence on temperature at heating (-H) and cooling (-C)

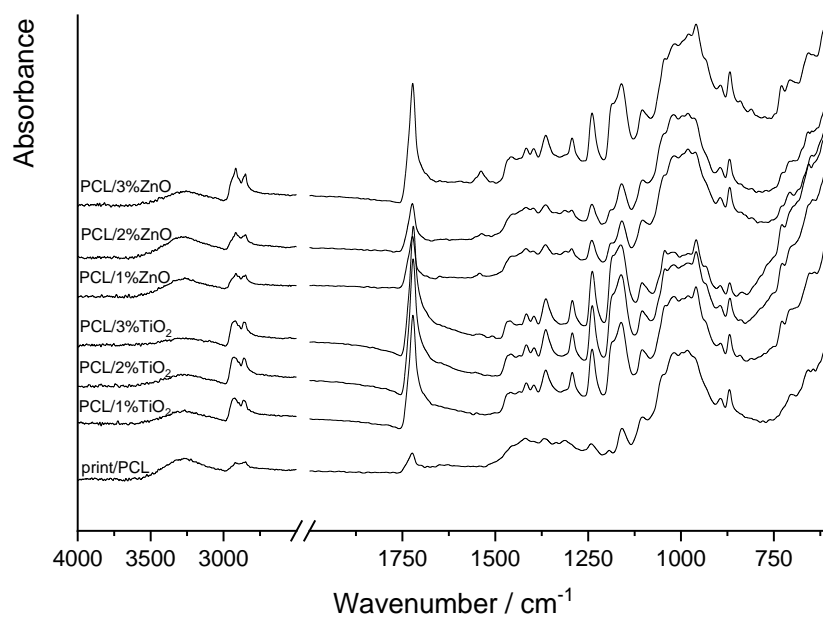

**Figure S2.** FTIR spectra of paper, TC print and TC print coated with neat PCL coating and nanomodified PCL coatings
